# Supplementary material
Source: PubMed Central journal article supplement (PMC2877561)
Supplement: JCI41250sd.pdf [file JCI41250sd.pdf]

Supplementary Figure 1

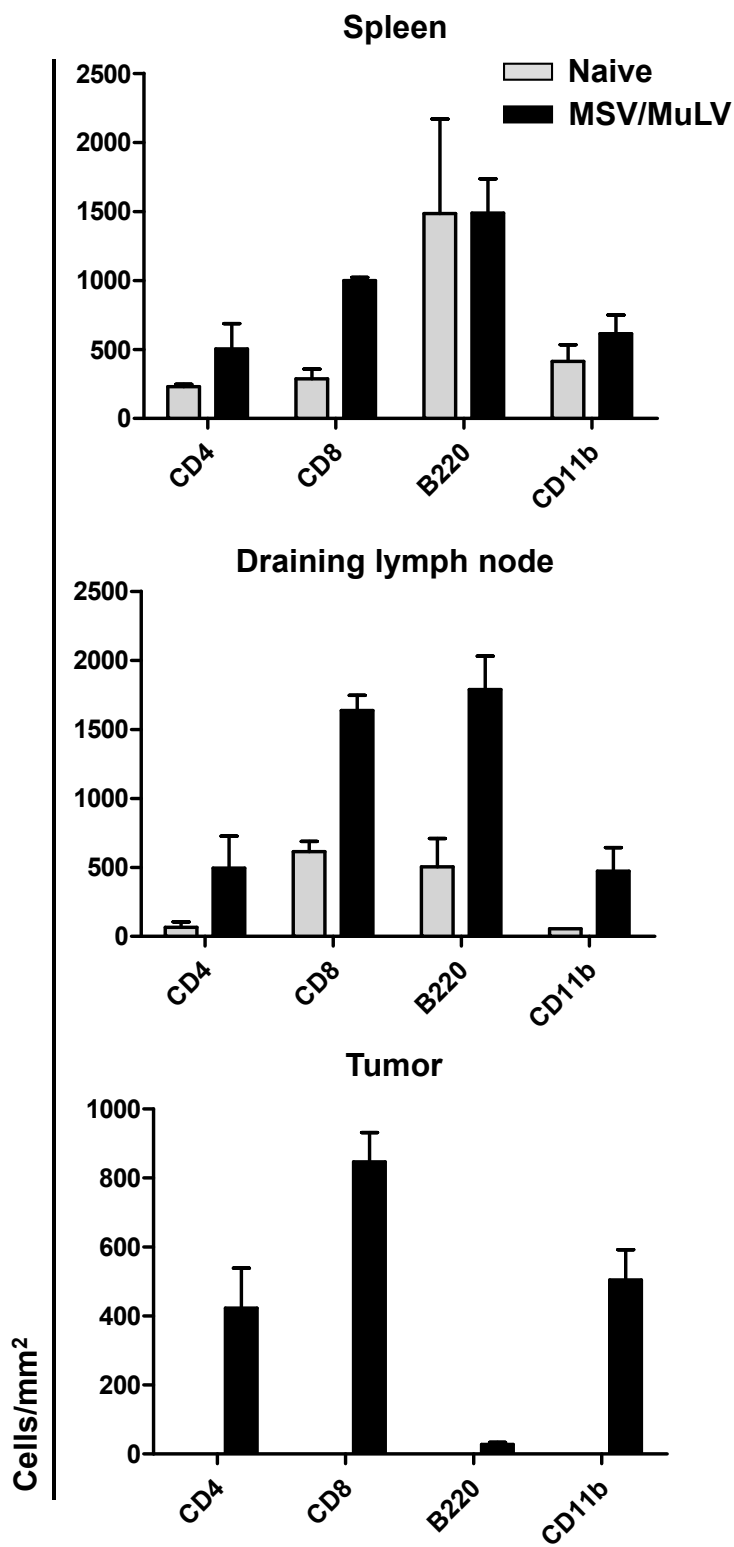

**Immunostaining of different immune cell types in distinct tissues from MSV/MuLV-infected mice.** The data from Figure 2b is presented to show the relative densities of different cell types in the same tissue.

Supplementary Figure 2

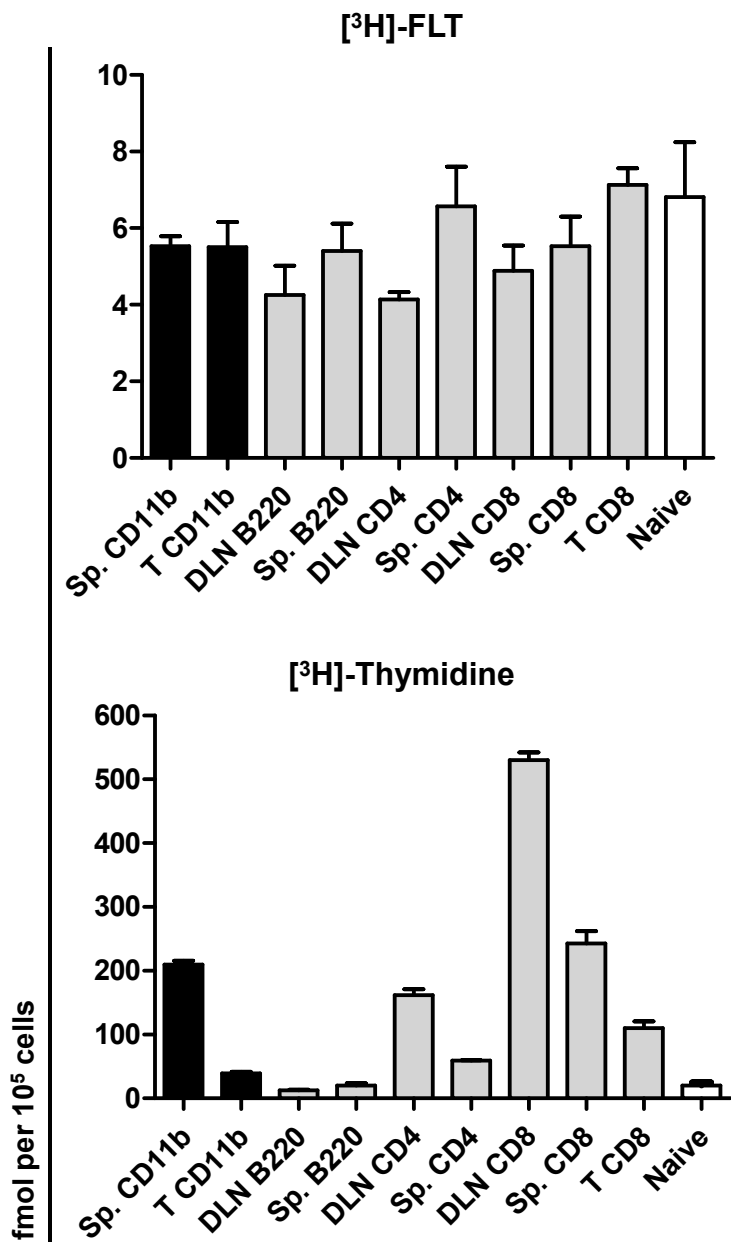

**[<sup>3</sup>H]-FLT and [<sup>3</sup>H]-thymidine accumulation in innate and adaptive immune cells isolated from MSV/MuLV-infected mice.** Innate and adaptive cell types were sorted from the spleen, DLN, and tumor of immune competent mice inoculated 14 days prior with MSV/MuLV. 10<sup>5</sup> of each cell type was assayed for cell intrinsic accumulation of thymidine salvage probes [<sup>3</sup>H]-FLT and [<sup>3</sup>H]-thymidine and compared to that of total naïve lymphocytes (naïve). DLN: Draining Lymph Node.
